# Supplementary material for: Plant-Mediated Synthesis of Mono- and Bimetallic (Au–Ag) Nanoparticles: Future Prospects for Food Quality and Safety
Source: Hindawi journal article supplement (doi:10.1155/2023/2781667), 2023-05-02
Supplement: f1 [file 2781667.f1.docx]

Supplementary information

# Plant-mediated synthesis of mono and bimetallic (Au-Ag) nanoparticles: future prospects for food quality and safety

Sabyasachi Ghosh1,3,5, Swarup Roy2,4, Jishu Naskar1 and Ramen Kumar Kole3

1Department of Biochemistry and Biophysics, University of Kalyani, Kalyani, Nadia–741235, West Bengal, India.

2BioNanocomposite Research Center, Department of Food and Nutrition, Kyung Hee University, 26 Kyungheedae–ro, Dongdaemun–gu, Seoul 02447, Republic of Korea.

3Department of Agricultural Chemicals, Bidhan Chandra Krishi Viswavidyalaya, Mohanpur, Nadia–741252, West Bengal, India.

4School of Bioengineering and Food Technology, Shoolini University, Bajhol, Solan–173229, Himachal Pradesh, India.

5Department of Biotechnology, School of Life Sciences, Swami Vivekananda University, Barrackpore–700121, West Bengal, India.

Correspondence should be addressed to Swarup Roy; swaruproy2013@gmail.com and Ramen Kumar Kole; [rkkole@yahoo.com](mailto:rkkole@yahoo.com)

[This file includes Tables S1-S2 and Total 4 Pages]

Table S1: Factors affecting plant extracts mediated biosynthesis of nanoparticles [1,2,3].

| Sl. No. | **Parameter** | **Parameter effects on properties** |
| --- | --- | --- |
| 1. | Precursor concentration | Number of NPs, Morphology |
| 2. | Extract concentration | Size, size distribution |
| 3. | pH | Size, size distribution |
| 4. | Temperature | Size, size distribution |
| 5. | Reaction time | Size, morphology |

Table S2: Techniques used for characterization of NPs [4,5,6].

| **Sl. No.** | **Characterization techniques** | **Characteristic Feature** |
| --- | --- | --- |
| 1. | UV–vis spectroscopy | Optical properties especially of metal origin, concentration and nature (alloy/core-shell) of bimetallic NPs. |
| 2. | DLS | Detect agglomerations of NPsand size distribution of NPs in solution |
| 3. | Zeta potential | Surface charge of NPs that responsible for stability. |
| 4. | FTIR | Detection of functional groups on the outer surface of NPs that are responsible for reduction and stabilizing or capping of metal NPs. |
| 5. | MS | Mass of the compound attached to the surface of NPs. |
| 6. | AFM | Investigate the 2D and 3D shape of NPs |
| 7. | HR-TEM, TEM, SEM | Particle size, monodispersity, morphology, aggregation and size distributions of NPs. |
| 8. | EDX | Elemental composition and its percentage as well. |
| 9. | XRD | Crystal nature of NPs. |
| 10. | TGA | Thermal behaviour analysis |
| 11. | AAS, ICP-MS | Assessment of NPs concentrations, chemical compositions and size distributions |
| 12. | XPS | Elemental composition within the metal NPs. |
| 13. | Raman spectroscopy | Determine vibrational, rotational, and other states in a molecular system, capable of probing the chemical structure of NPs. |

NPs: Nanoparticles; AAS: Atomic adsorption spectroscopy; AFM: Atomic force microscope; DLS: Dynamic light scattering; EDX: Energy dispersive X–ray Spectroscopy; FTIR: Fourier Transform Infrared Spectroscopy; MS: Mass Spectroscopy; ICP-MS: Inductively coupled plasma-MS; SEM: Scanning electron microscope; TEM: Transmission electron microscopy; HR-TEM: High-resolution Transmission electron microscope; TGA: Thermogravimetric analysis; UV-vis: Ultraviolet-visible; XRD: X-ray diffraction; XPS: X-ray photoelectron spectroscopy.

**References**

1. S. Ghosh, S. Roy, J. Naskar, and R. K. Kole, “Process optimization for biosynthesis of mono and bimetallic alloy nanoparticle catalysts for degradation of dyes in individual and ternary mixture,” *Scientific Reports,* vol. 10, pp. 1-14, Article 277, 2020.
2. C. Krishnaraj, R. Ramachandran, K. Mohan, and P.T. Kalaichelvan, “Optimization for rapid synthesis of silver nanoparticles and its effect on phytopathogenic fungi,” *Spectrochimica Acta Part A: Molecular and Biomolecular Spectroscopy,* vol. 93, pp. 95-99, 2012.
3. M. Kumari, A. Mishra, S. Pandey, et al., “Physico-Chemical Condition Optimization during Biosynthesis lead to development of Improved and Catalytically Efficient Gold Nano Particles,” *Scientific Reports*, vol. 6, Article ID 27575, 2016.
4. S. Mourdikoudis, R.M. Pallares, and N.T. Thanh, “Characterization techniques for nanoparticles: comparison and complementarity upon studying nanoparticle properties”, *Nanoscale*, vol. 10 no. 27, pp.12871– 12934, 2018.
5. Titus D, E.J.J. Samuel, and S.M. Roopan, “Chapter 12 - Nanoparticle characterization techniques, In: Shukla AK, Iravani S (eds) Green synthesis, characterization and applications of nanoparticles. Elsevier, Amsterdam, pp. 303–319. 2019.
6. J.K. Patra, Y. Kwon, and K.H. Baek, “Green biosynthesis of gold nanoparticles by onion peel extract: Synthesis, characterization and biological activities”, *Advanced Powder Technology,* vol. 27, no. 5, pp. 2204–2213, 2016.
